# Supplementary material
Source: PubMed Central journal article supplement (PMC8959089)
Supplement: NIHMS1777124-supplement-Supplemental_Publication_Material.pdf [file NIHMS1777124-supplement-Supplemental_Publication_Material.pdf]

**SUPPLEMENTAL MATERIALS**

**Supplemental Figure I. Schematic of Individual Patient Simulation Model**

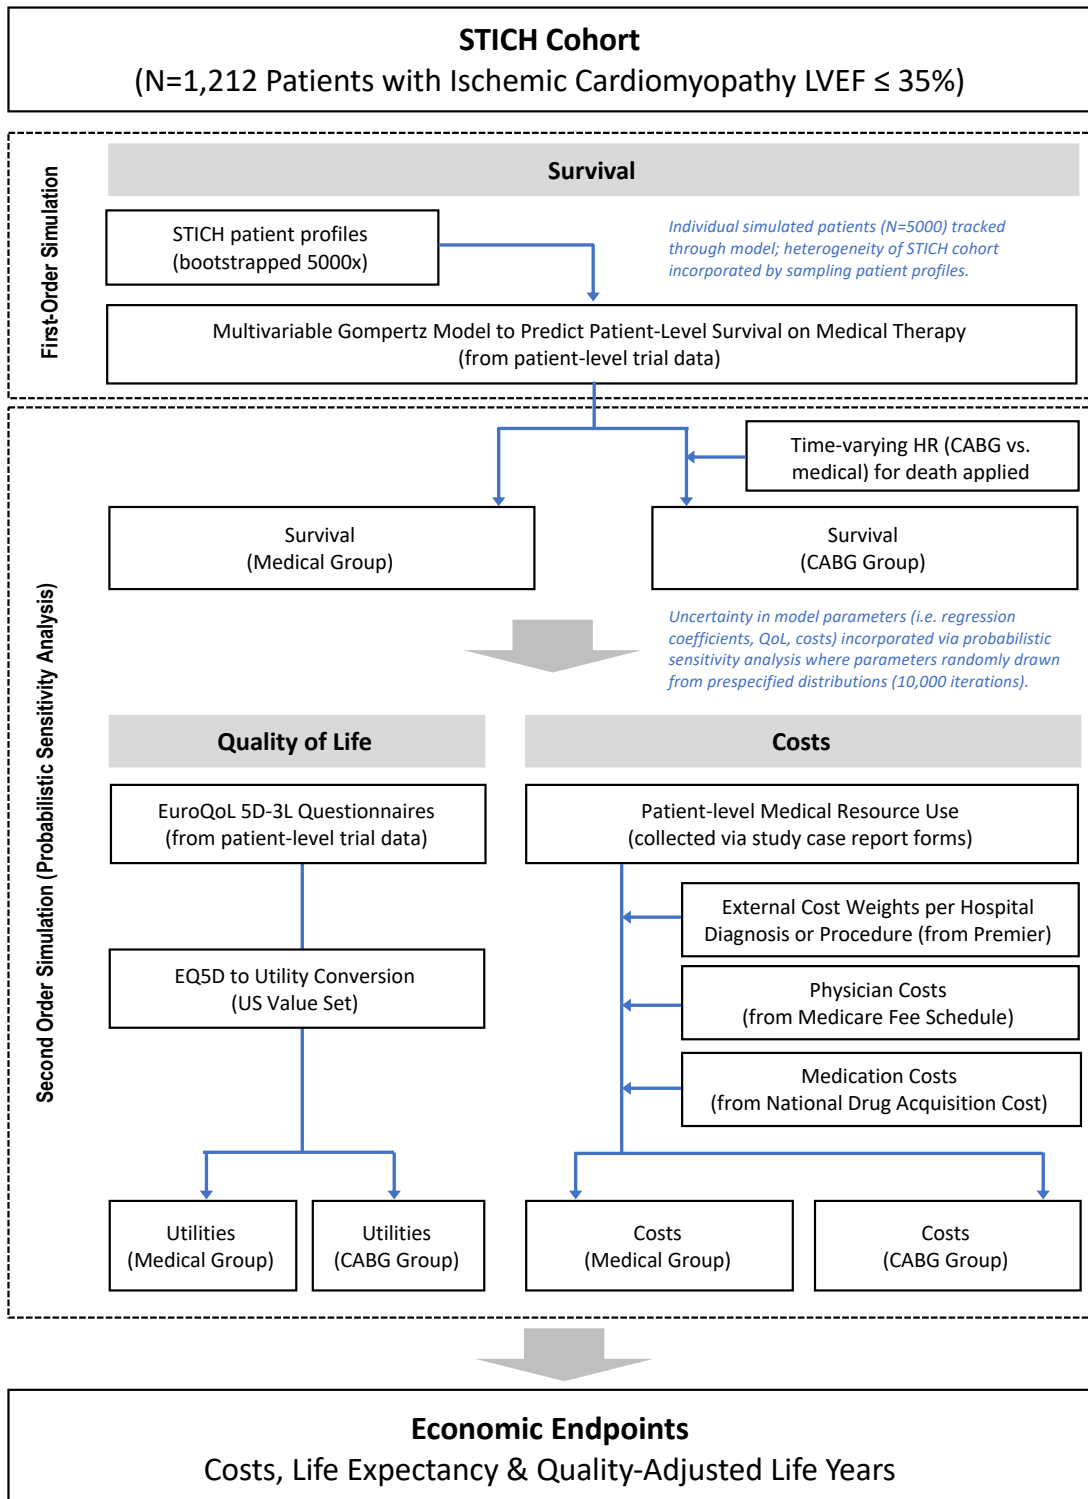

**Supplemental Figure II.** (A) Mean weighted interval hospitalization cost, given hospitalization, by Treatment. (B) Mean interval costs per patient in overall cohort, by Treatment. Note: Costs do not include physician fees.

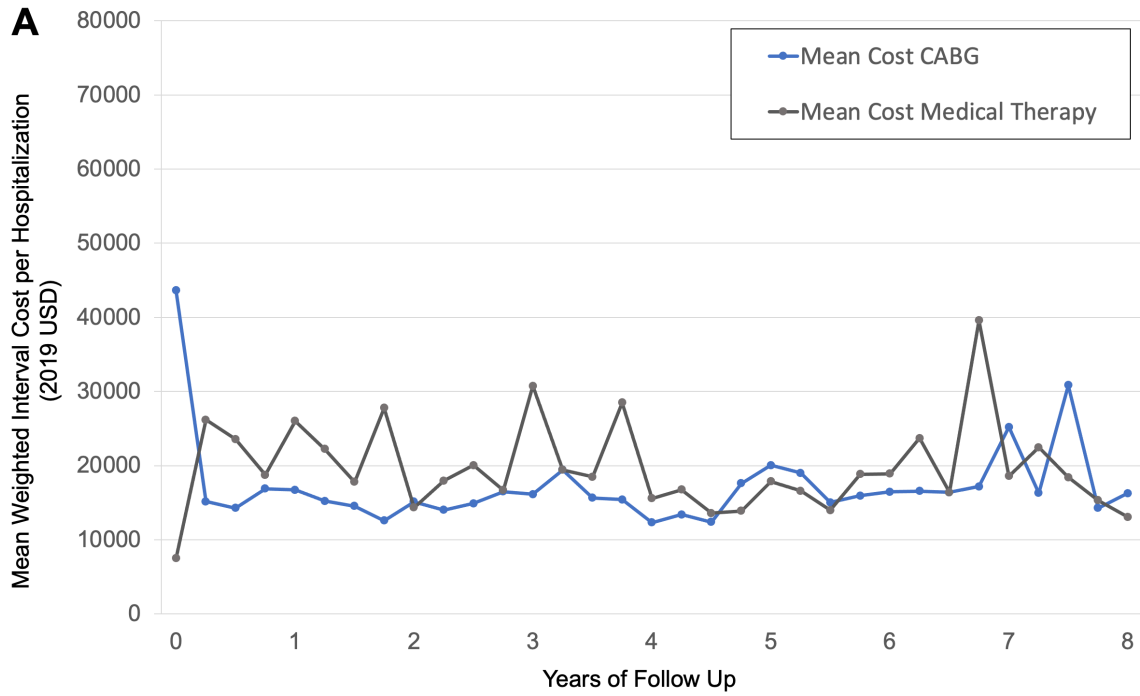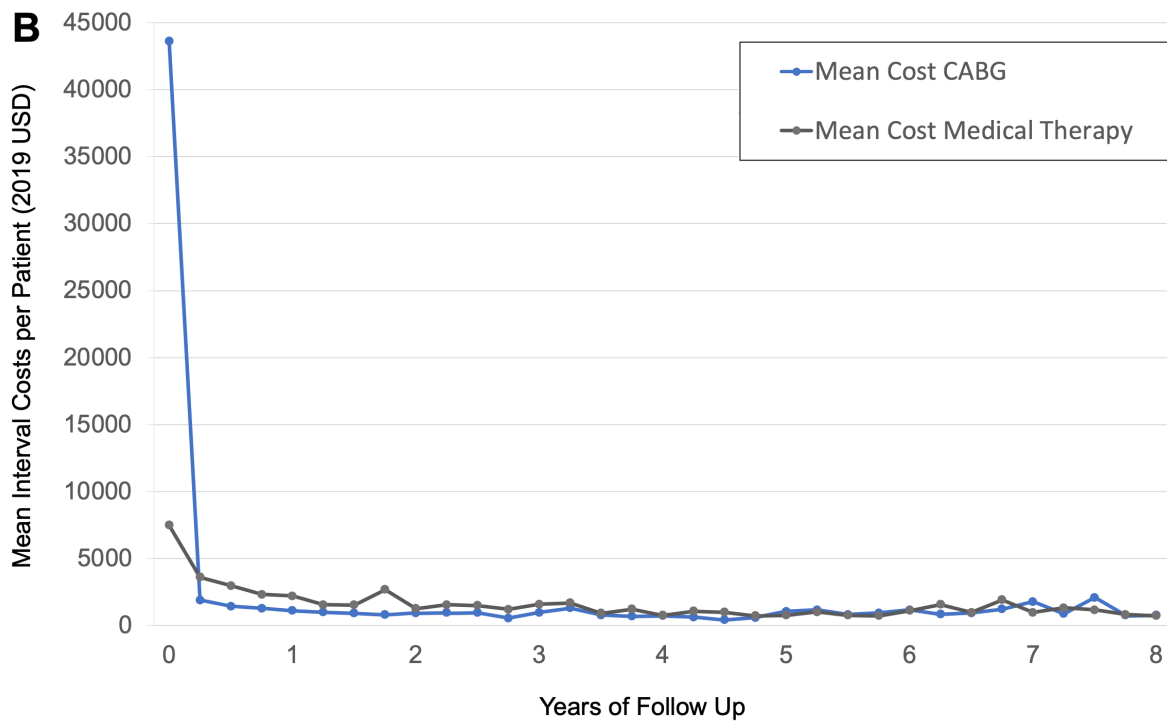

**Supplemental Table I. Parametric Gompertz Survival Model**

Functional form of the survivor function:

$$S(t) = \exp(-(\lambda/\gamma) \cdot \exp(\gamma \cdot t) - 1)$$

where:

$$\lambda \text{ (scale)} = \exp(k + \beta_{\text{age}} \cdot \text{age} + \beta_{\text{sex}} \cdot \text{sex} + \beta_{\text{smoker}} \cdot \text{smoker} + \beta_{\text{NYHA}} \cdot \text{NYHA class} + \beta_{\text{diabetes}} \cdot \text{diabetes} + \beta_{\text{LVEF}} \cdot \text{LVEF} + \beta_{\text{creatinine}} \cdot \text{creatinine} + \beta_{\text{Hgb}} \cdot \text{Hgb} + \beta_{\text{MRseverity}} \cdot \text{MR severity} + \beta_{\text{vessels}} \cdot \text{vessels})$$

$$K \text{ (constant)} = -5.530693$$

$$\gamma \text{ (shape)} = 0.0031644$$

| Covariate ( $\beta$ )                                           | Coefficient | Standard Error | Univariate Wald $\chi^2$ Test |
|-----------------------------------------------------------------|-------------|----------------|-------------------------------|
| Age                                                             | 0.0164      | 0.0058         | 9.63                          |
| Female Sex                                                      | -0.3072     | 0.1730         | 3.05                          |
| Smoker                                                          | 0.2762      | 0.1247         | 7.64                          |
| NYHA class                                                      | 0.1849      | 0.0752         | 16.82                         |
| Diabetes                                                        | 0.1177      | 0.1053         | 1.44                          |
| Left ventricular ejection fraction                              | -0.2175     | 0.0064         | 21.49                         |
| Creatinine                                                      | 0.2574      | 0.0930         | 22.93                         |
| Hemoglobin                                                      | -0.0567     | 0.0314         | 4.50                          |
| Mitral Regurgitation Severity<br>(none, trace/mild, mod-severe) | 0.2052      | 0.0649         | 13.45                         |
| Number of Vessels (>75% Stenosis)                               | 0.0674      | 0.0626         | 3.83                          |
| K (Constant)                                                    | -5.5307     | 0.7171         | N/A                           |
| $\gamma$ (Shape)                                                | 0.0032      | 0.0015         | N/A                           |

**Supplemental Table II.** Base case clinical and utility inputs

| <b>Variable</b>                                            | <b>Base Case Input</b> | <b>Range<sup>†</sup></b> | <b>Distribution</b> | <b>Reference</b>     |
|------------------------------------------------------------|------------------------|--------------------------|---------------------|----------------------|
| <b><i>Clinical Inputs</i></b>                              |                        |                          |                     |                      |
| Hazard Ratio of all-cause death (CABG vs. Medical Therapy) |                        |                          | Log-normal          | Trial                |
| Over entire follow up period                               | 0.84                   | 0.73-0.97                |                     |                      |
| ≤ 60 days                                                  | 2.55                   | 1.4-4.6                  |                     |                      |
| 61 days to 365 days                                        | 0.75                   | 0.50-1.12                |                     |                      |
| 366 days to 2 years                                        | 1.00                   | 0.66-1.51                |                     |                      |
| ≥ 2 years                                                  | 0.74                   | 0.63-0.89                |                     |                      |
| <b><i>Utilities</i></b>                                    |                        |                          |                     |                      |
| Medical Therapy                                            |                        |                          | Beta                | Trial, <sup>22</sup> |
| Baseline                                                   | 0.723                  | ± 0.244                  |                     |                      |
| 4 months                                                   | 0.774                  | ± 0.226                  |                     |                      |
| 12 months                                                  | 0.776                  | ± 0.240                  |                     |                      |
| 24 months                                                  | 0.781                  | ± 0.259                  |                     |                      |
| 36 months                                                  | 0.815                  | ± 0.216                  |                     |                      |
| CABG                                                       |                        |                          | Beta                | Trial, <sup>22</sup> |
| Baseline                                                   | 0.693                  | ± 0.258                  |                     |                      |
| Utility Increments (CABG vs Med)                           |                        |                          |                     |                      |
| 4 months                                                   | 0.047                  | 0.013-0.081              |                     |                      |
| 12 months                                                  | 0.052                  | 0.018-0.086              |                     |                      |
| 24 months                                                  | 0.044                  | 0.006-0.081              |                     |                      |
| 36 months                                                  | 0.036                  | -0.001-0.074             |                     |                      |
| <b><i>Costs (2019 USD)</i></b>                             |                        |                          |                     |                      |
| Annual Cost of Office Visits                               | 3,407                  | 3,014 - 3,800            | Gamma               | <sup>25</sup>        |
| Annual Medication Costs                                    | 4,773                  | 4,419 - 5,128            | Gamma               | <sup>25</sup>        |

† Uncertainty range reported as ± standard deviations or 95% confidence intervals unless otherwise specified.

**Supplemental Table III.** Cost of hospitalizations and inpatient procedures during trial follow-up period

|                                        | Number of Visits / Procedures |                 | Cost Weights† (2019 USD) |                             |                             |
|----------------------------------------|-------------------------------|-----------------|--------------------------|-----------------------------|-----------------------------|
|                                        | CABG                          | Medical Therapy | Mean                     | 10 <sup>th</sup> Percentile | 90 <sup>th</sup> Percentile |
| <b>Procedures‡</b>                     |                               |                 |                          |                             |                             |
| Heart Transplant                       | 1                             | 4               | 272,339                  | 175,184                     | 425,043                     |
| Left Ventricular Assist Device         | 2                             | 1               | 242,811                  | 154,486                     | 331,716                     |
| Coronary Artery Bypass Grafting        | 2                             | 93              | 46,577                   | 29,853                      | 68,724                      |
| Implantable Cardioverter Defibrillator | 90                            | 117             | 38,845                   | 24,456                      | 55,551                      |
| Cardiac Resynchronization Therapy      | 13                            | 12              | 28,305                   | 17,862                      | 40,591                      |
| Pacemaker                              | 11                            | 6               | 22,075                   | 12,666                      | 35,151                      |
| Percutaneous Coronary Intervention     | 48                            | 66              | 19,145                   | 11,184                      | 30,412                      |
| Coronary Angiography                   | 50                            | 97              | 13,208                   | 6,224                       | 23,955                      |
| <b>Hospitalization</b>                 |                               |                 |                          |                             |                             |
| Acute myocardial Infarction            | 43                            | 71              | 9,061                    | 3,943                       | 16,515                      |
| Arrhythmia                             | 117                           | 99              | 8,192                    | 3,263                       | 16,362                      |
| Stroke                                 | 37                            | 30              | 12,024                   | 4,939                       | 23,165                      |
| Heart Failure                          | 255                           | 303             | 8,014                    | 3,732                       | 14,096                      |
| Other cardiovascular                   | 68                            | 63              | 8,533                    | 3,314                       | 17,005                      |
| Infection                              | 109                           | 67              | 16,106                   | 6,215                       | 30,806                      |
| Gastrointestinal                       | 52                            | 65              | 11,162                   | 4,747                       | 20,438                      |
| Pulmonary                              | 46                            | 26              | 10,465                   | 4,391                       | 19,348                      |
| Renal                                  | 32                            | 24              | 8,765                    | 3,827                       | 16,372                      |
| Malignancy                             | 28                            | 23              | 13,599                   | 5,155                       | 26,103                      |
| Other non-cardiovascular               | 207                           | 184             | 11,313                   | 4,174                       | 22,193                      |

†Cost weights exclude physician fees, and are reported for inpatient procedures (see Table S3B for cost weights for outpatient / day procedures). ‡Admission and procedural categories are defined hierarchically. That is, if a patient had more than one procedure per visit, procedures were attributed based on highest drivers of cost. For hospitalization, encounters were classified as cardiovascular-related or non-cardiovascular. The hierarchical structure is represented in the listed order of the table.

**Supplemental Table IV.** Cost of outpatient hospital procedures during trial follow-up period

|                                        | Number of Visits / Procedures |                 | Cost Weights† (2019 USD) |                             |                             |
|----------------------------------------|-------------------------------|-----------------|--------------------------|-----------------------------|-----------------------------|
|                                        | CABG                          | Medical Therapy | Mean                     | 10 <sup>th</sup> Percentile | 90 <sup>th</sup> Percentile |
| <b>Procedures†</b>                     |                               |                 |                          |                             |                             |
| Implantable Cardioverter Defibrillator | 31                            | 31              | 30,327                   | 19,872                      | 47,336                      |
| Cardiac Resynchronization Therapy      | 13                            | 18              | 18,197                   | 12,182                      | 25,999                      |
| Pacemaker                              | 13                            | 15              | 13,463                   | 7,966                       | 20,343                      |
| Percutaneous Coronary Intervention     | 7                             | 7               | 12,805                   | 8,524                       | 17,821                      |
| Coronary Angiography                   | 46                            | 70              | 6,386                    | 4,601                       | 9,751                       |

†Cost weights exclude physician fees

**Supplemental Table V.** Comparison of undiscounted Life Years estimated by parametric model compared to Life Years from trial using restricted mean survival time.

| Time Horizon   | Medical Management |        | CABG               |        |
|----------------|--------------------|--------|--------------------|--------|
|                | RMST               | Model* | RMST               | Model* |
| <b>1 year</b>  | 0.93 (0.92 - 0.95) | 0.95   | 0.91 (0.89 - 0.93) | 0.93   |
| <b>3 year</b>  | 2.55 (2.48 - 2.62) | 2.56   | 2.53 (2.45 - 2.60) | 2.56   |
| <b>5 year</b>  | 3.88 (3.74 - 4.01) | 3.89   | 3.94 (3.80 - 4.08) | 3.95   |
| <b>10 year</b> | 6.11 (5.82 - 6.40) | 6.14   | 6.51 (6.21 - 6.80) | 6.55   |

\*Modelled LYs were estimated using a bootstrap (N=20,000) of individual patient risk profiles from STICH. Abbreviations: CABG – coronary artery bypass grafting; RMST – restricted mean survival time.

**Supplemental Table VI.** Model inputs for Sensitivity and Subgroup Analyses

| Variable                                                               | Base Case Input | Range (95% CI) | Distribution | Reference            |
|------------------------------------------------------------------------|-----------------|----------------|--------------|----------------------|
| <b>Subgroup Analysis (LVEF ≤ 28% vs. &gt; 28%)</b>                     |                 |                |              |                      |
| HR of all-cause death (CABG vs. Medical Therapy) if LVEF ≤ 28%         |                 |                | Log-normal   | Trial                |
| Over entire follow up period                                           | 0.77            | 0.64-0.92      |              |                      |
| ≤ 60 days                                                              | 2.18            | 1.08-4.41      |              |                      |
| 61 days to 365 days                                                    | 0.62            | 0.37-1.06      |              |                      |
| 366 days to 2 years                                                    | 0.89            | 0.54-1.48      |              |                      |
| ≥ 2 years                                                              | 0.68            | 0.54-0.86      |              |                      |
| HR of all-cause death (CABG vs. Medical Therapy) if LVEF > 28%         |                 |                |              |                      |
| Over entire follow up period                                           | 0.89            | 0.71-1.11      |              |                      |
| ≤ 60 days                                                              | 3.32            | 1.07-10.3      |              |                      |
| 61 days to 365 days                                                    | 0.95            | 0.50-1.81      |              |                      |
| 366 days to 2 years                                                    | 1.13            | 0.56-2.32      |              |                      |
| ≥ 2 years                                                              | 0.78            | 0.60-1.02      |              |                      |
| <b>Subgroup Analysis (0-2 Vessel Disease vs. 3 Vessel Disease)</b>     |                 |                |              |                      |
| HR of all-cause death (CABG vs. Medical Therapy) if 0-2 Vessel Disease |                 |                | Log-normal   | Trial                |
| Over entire follow up period                                           | 0.93            | 0.78-1.11      |              |                      |
| ≤ 60 days                                                              | 3.88            | 1.68-8.94      |              |                      |
| 61 days to 365 days                                                    | 0.77            | 0.44-1.35      |              |                      |
| 366 days to 2 years                                                    | 1.05            | 0.62-1.80      |              |                      |
| ≥ 2 years                                                              | 0.83            | 0.67-1.03      |              |                      |
| HR of all-cause death (CABG vs. Medical Therapy) if 3 Vessel Disease   |                 |                |              |                      |
| Over entire follow up period                                           | 0.68            | 0.54-0.86      |              |                      |
| ≤ 60 days                                                              | 1.29            | 0.52-3.21      |              |                      |
| 61 days to 365 days                                                    | 0.70            | 0.39-1.27      |              |                      |
| 366 days to 2 years                                                    | 0.91            | 0.47-1.75      |              |                      |
| ≥ 2 years                                                              | 0.60            | 0.45-0.80      |              |                      |
| <b>Sensitivity Analysis – Alternate Quality of Life Extrapolation</b>  |                 |                |              |                      |
| CABG – Mean Utility in STICH                                           | 0.800           | 0.794-0.806    | Beta         | Trial, <sup>22</sup> |
| Medical Management – Mean Utility in STICH                             | 0.785           | 0.779-0.791    | Beta         | Trial, <sup>22</sup> |
